# Supplementary material
Source: ML conference proceedings conference paper supplement (https://openreview.net/forum?id=IUzQfdkkoL)
Supplement: supplementary_material [file attachment]

## Sheet: Sheet1
Object_name	Food_Type	FNDDS Food Code	Weight (g)	Energy (Kcal)	Protein (g)	Fat (g)	Carbs (g)	Volume
Almond(bowl)	almond_1	42100100	187	1118.26	39.1952	98.2498	39.2887	341.29
Almond(bowl)	almond_3	42101110	264	1586.64	53.14	141.05	53.27	484.24
Almond(bowl)	almond_4	42100100	121	723.57	25.3613	63.5725	25.4218	218.56
Almond(bowl)	new_almond_bowl_1	42101130	228	1383.96	46.3524	123.029	46.4664	577.95
Almond(bowl)	new_almond_bowl_2	42101130	176	1068.32	35.7808	94.9696	35.8688	403.62
Almond(bowl)	new_almond_bowl_3	42101120	244	1473.76	49.3612	131.028	49.4832	444.24
Almond(bowl)	new_almond_bowl_4	42101120	218	1316.72	44.1014	117.066	44.2104	340.77
Almonds	almond_1	42101350	3	17.37	0.4233	1.3602	1.0752	3.4
Almonds	Almond_2	42100100	1	5.98	0.2096	0.5254	0.2101	0.88
Almonds	Almond_3	42100100	1	5.98	0.2096	0.5254	0.2101	0.89
Almonds	Almond_5	42100100	1	5.98	0.2096	0.5254	0.2101	0.77
Almonds	new_almonds_1	42100100	13	77.74	2.7248	6.8302	2.7313	8.88
Almonds	new_almonds_2	42100100	2	11.96	0.4192	1.0508	0.4202	1.72
Almonds	new_almonds_3	42101000	4	23.16	0.846	1.9972	0.862	3.69
Almonds	new_almonds_4	42100100	3	17.94	0.6288	1.5762	0.6303	2.02
Apple	apple_1	63101000	190	115.9	0.323	0.285	28.12	243.52
Apple	apple_2	63101000	195	118.95	0.3315	0.2925	28.86	234.01
Apple	apple_3	63101000	205	125.05	0.3485	0.3075	30.34	240.84
Apple	apple_4	63101000	234	142.74	0.3978	0.351	34.632	280.55
Apple	apple_5	63101000	176	107.36	0.2992	0.264	26.048	198.51
Apple	apple_6	63101000	222	135.42	0.3774	0.333	32.856	261.42
Apple	apple_7	63101000	186	113.46	0.3162	0.279	27.528	221.73
Applesauce	sauce1	63101110	133	90.44	0.2128	0.2261	23.2617	135.07
Applesauce	new_applesauce_1	63101120	124	52.08	0.2108	0.124	13.9748	112.07
Applesauce	new_applesauce_2	63101120	340	142.8	0.578	0.34	38.318	362.8
Applesauce	new_applesauce_3	63101110	94	63.92	0.1504	0.1598	16.4406	100.82
Applesauce	new_applesauce_4	63101110	119	80.92	0.1904	0.2023	20.8131	102.16
Avocado	Avocado_7	63105010	210	336	4.2	30.786	17.913	209.1
Avocado	Avocado_8	63105010	199	318.4	3.98	29.1734	16.9747	201.81
Avocado	Avocado_9	63105010	188	300.8	3.76	27.5608	16.0364	189.44
Avocado	avocado_2	63105010	135	216	2.7	19.791	11.5155	133.53
Avocado	avocado_3	63105010	82	131.2	1.64	12.0212	6.9946	83.42
Avocado	avocado_4	63105010	82	131.2	1.64	12.0212	6.9946	84.84
Avocado	avocado_5	63105010	137	219.2	2.74	20.0842	11.6861	134.68
Asparagus	new_asparagus_1	75202027	4	1.96	0.0916	0.13	0.1616	5.11
Asparagus	new_asparagus_2	75202011	8	1.68	0.1888	0.0104	0.3328	7.32
Asparagus	new_asparagus_3	75202011	19	3.99	0.4484	0.0247	0.7904	19.17
Asparagus	new_asparagus_4	75202011	45	9.45	1.062	0.0585	1.872	99.41
Asparagus	new_asparagus_5	75202011	373	78.33	8.8028	0.4849	15.5168	654.96
Bacon	bacon1	22600200	5	24.2	1.8705	1.79	0.095	6.01
Bacon	bacon2	21601000	8	35.92	2.504	2.752	0.112	7.07
Bacon	new_bacon_1	21601000	25	112.25	7.825	8.6	0.35	36.52
Bacon	new_bacon_2	21601000	12	53.88	3.756	4.128	0.168	13.05
Bacon	new_bacon_3	22601000	60	280.8	20.352	21.054	1.02	145.11
Bacon	new_bacon_4	24208500	77	283.36	22.715	19.9199	3.2648	186.45
Bagel	bagel_1	51180010	102	269.28	10.7712	1.3464	53.4276	283.09
Bagel	bagel_2	51180010	92	242.88	9.7152	1.2144	48.1896	281.09
Bagel	bagel_3	51180010	94	248.16	9.9264	1.2408	49.2372	262.15
Bagel	bagel_4	51180010	75	198	7.92	0.99	39.285	202.06
Bagel	bagel_5	51180010	74	195.36	7.8144	0.9768	38.7612	218.49
Bagel	bagel_6	51180010	84	221.76	8.8704	1.1088	43.9992	255.21
Bagel	bagel_7	51180010	109	287.76	11.5104	1.4388	57.0942	273.32
Bagel	bagel_8	51180010	114	300.96	12.0384	1.5048	59.7132	258.42
Bagel	new_bagel_1	51180030	104	278.72	10.2232	1.2584	57.2728	293.29
Baked_Potato	Potato_1	71100100	230	213.9	4.485	0.23	49.335	234.79
Baked_Potato	Potato_2	71100100	237	220.41	4.6215	0.237	50.8365	260.39
Baked_Potato	Potato_3	71100100	273	253.89	5.3235	0.273	58.5585	284.35
Baked_Potato	Potato_4	71100100	195	181.35	3.8025	0.195	41.8275	178.07
Baked_Potato	Potato_5	71100100	189	175.77	3.6855	0.189	40.5405	174.48
Baked_Potato	Potato_6	71100100	204	189.72	3.978	0.204	43.758	183.47
Baked_Potato	Potato_7	71100100	162	150.66	3.159	0.162	34.749	157.98
Banana	Banana1	63107010	182	176.54	1.3468	0.5096	41.3322	197.82
Banana	Banana2	63107010	153	148.41	1.1322	0.4284	34.7463	163.09
Banana	Banana3	63107010	187	181.39	1.3838	0.5236	42.4677	201.58
Banana	banana4	63107010	196	190.12	1.4504	0.5488	44.5116	200.55
Banana	banana5	63107010	194	188.18	1.4356	0.5432	44.0574	199.83
Banana	banana6	63107010	167	161.99	1.2358	0.4676	37.9257	175.08
Banana	new_banana_1	63107010	178	172.66	1.3172	0.4984	40.4238	184.1
Beans	baked_bean_1	41100990	48	90.72	4.0032	3.3984	11.4143	75.37
Beans	baked_bean_2	41201010	158	165.9	7.1416	1.4062	34.0806	174.41
Beans	baked_bean_4	41100990	0.5455	1.031	0.0454947	0.0386214	0.12972	0.38
Beans	new_beans_1	41101070	203	276.08	16.1588	1.6443	50.8312	201.85
Beans	new_beans_2	41101070	194	263.84	15.4424	1.5714	48.5776	267.45
Beans	new_beans_3	41101070	377	512.72	30.0092	3.0537	94.4008	415.42
Beans	new_beans_4	41101070	385	523.6	30.646	3.1185	96.404	351.29
Bell Pepper	new_bell_pepper_1	75122100	242	48.4	2.0812	0.4114	11.2288	389.33
Bell Pepper	new_bell_pepper_2	75122100	13	2.6	0.1118	0.0221	0.6032	21.19
Bell Pepper	new_bell_pepper_3	75122100	12	2.4	0.1032	0.0204	0.5568	12.67
Bell Pepper	new_bell_pepper_4	75122200	12	3.12	0.1188	0.036	0.7236	23.67
Bell Pepper	new_bell_pepper_5	75122200	14	3.64	0.1386	0.042	0.8442	13.12
Biscuits	biscuit1	52101000	49	181.3	3.4692	9.2708	20.9818	112.32
Biscuits	biscuit2	52101000	48	177.6	3.3984	9.0816	20.5536	116.84
Biscuits	biscuit3	52101000	48	177.6	3.3984	9.0816	20.5536	120.24
Biscuits	biscuit_4	52101000	50	185	3.54	9.46	21.41	76.76
Biscuits	biscuit_5	52101000	42	155.4	2.9736	7.9464	17.9844	86.66
Biscuits	biscuit_6	52101000	43	159.1	3.0444	8.1356	18.4126	88.59
Biscuits	new_biscuit_1	58128000	112	250.88	6.944	16.4416	19.0176	227.99
Biscuits	new_biscuit_2	58128000	66	147.84	4.092	9.6888	11.2068	131.65
Biscuits	new_biscuit_3	58128000	35	78.4	2.17	5.138	5.943	62.56
Biscuits	new_biscuit_4	58128000	39	87.36	2.418	5.7252	6.6222	88.42
Blueberries	Blueberry_2	63203010	16	9.12	0.1184	0.0528	2.3184	11.1
Blueberries	Blueberry_3	63203010	3	1.71	0.0222	0.0099	0.4347	6.95
Blueberries	Blueberry_4	63203010	2.33	1.3281	0.017242	0.007689	0.337617	3.91
Blueberries	Blueberry_5	63203010	1.67	0.9519	0.012358	0.005511	0.241983	2.11
Blueberries	new_blueberry_1	63203010	2	1.14	0.0148	0.0066	0.2898	1.38
Blueberries	new_blueberry_2	63203010	1	0.57	0.0074	0.0033	0.1449	1.54
Blueberries	new_blueberry_3	63203110	1	0.88	0.0104	0.004	0.2266	1.04
Blueberries	new_blueberry_4	63203110	1	0.88	0.0104	0.004	0.2266	1.11
Blueberry(bowl)	bowl1	63203010	188	107.16	1.3912	0.6204	27.2412	360.79
Blueberry(bowl)	last_blueberry_1	63203010	123	70.11	0.9102	0.4059	17.8227	221.11
Blueberry(bowl)	last_blueberry_2	63203010	140	79.8	1.036	0.462	20.286	251.45
Blueberry(bowl)	last_blueberry_3	63203010	216	123.12	1.5984	0.7128	31.2984	402.38
Blueberry(bowl)	last_blueberry_4	63203010	157	89.49	1.1618	0.5181	22.7493	295.22
Breaded_Fish	breaded_fish_1	26100140	119	320.11	19.0995	20.5037	13.9468	183.6
Breaded_Fish	breaded_fish_2	26100140	101	271.69	16.2105	17.4023	11.8372	133.62
Breaded_Fish	breaded_fish_3	26100140	109	293.21	17.4945	18.7807	12.7748	162.41
Breaded_Fish	breaded_fish_4	26100140	61	164.09	9.7905	10.5103	7.1492	78.53
Breaded_Fish	breaded_fish_5	26100140	85	228.65	13.6425	14.6455	9.962	108.97
Breaded_Fish	breaded_fish_6	26100140	67	180.23	10.7535	11.5441	7.8524	86.17
Breaded_Fish	breaded_fish_7	26100140	68	182.92	10.914	11.7164	7.9696	85
Breaded_Fish	breaded_fish_8	26100140	76	204.44	12.198	13.0948	8.9072	100.88
Breaded_Fish	new_breaded_fish_1	26100270	61	168.97	6.7161	9.9003	13.2126	66.83
Breaded_Fish	new_breaded_fish_2	26100140	133	357.77	21.3465	22.9159	15.5876	181.29
Broccoli	Broccoli_1	72201100	19	7.41	0.4883	0.0646	1.1913	30.82
Broccoli	Broccoli_2	72201100	15	5.85	0.3855	0.051	0.9405	23.72
Broccoli	Broccoli_3	72201100	20	7.8	0.514	0.068	1.254	32.7
Broccoli	broccoli_5	72201100	299	116.61	7.6843	1.0166	18.7473	528.92
Broccoli	broccoli_6	72201100	251	97.89	6.4507	0.8534	15.7377	417.57
Broccoli	broccoli_7	72201100	17	6.63	0.4369	0.0578	1.0659	31.37
Broccoli	broccoli_8	72201100	9	3.51	0.2313	0.0306	0.5643	14.61
Broccoli	new_broccoli_1	72201100	237	92.43	6.0909	0.8058	14.8599	457.57
Broccoli	new_broccoli_2	72201212	78	21.84	2.4102	0.0936	4.1574	205.98
Brownies	Brownies_1	53204010	94	380.7	4.512	15.322	60.066	80.29
Brownies	Brownies_2	53204010	97	392.85	4.656	15.811	61.983	84.1
Brownies	Brownies_3	53204010	104	421.2	4.992	16.952	66.456	112.52
Brownies	Brownies_4	53204010	103	417.15	4.944	16.789	65.817	104.39
Brownies	Brownies_5	53204010	101	409.05	4.848	16.463	64.539	114.8
Burger	Burger_1	27510155	191	567.27	34.2081	30.9611	35.6788	368.77
Burger	Burger_2	27510155	235	697.95	42.0885	38.0935	43.898	420.21
Burger	new_burger_1	27510389	200	522	23.88	28.2	43.06	445.76
Burger	new_burger_2	27510140	49	146.02	7.9429	7.0462	12.2451	142.25
Burger	new_burger_3	27510232	214	575.66	32.5494	30.816	42.2008	408.51
Burger	new_burger_4	27510231	296	793.28	40.5224	46.768	52.4808	535.82
Burrito	burrito_1	58100160	269	589.11	30.02	64.15	23.05	308.28
Burrito	burrito_2	58100160	535	1171.65	59.7	127.59	45.84	542.87
Burrito	burrito_3	58100160	291	637.29	32.47	69.4	24.93	311.17
Burrito	new_burrito_1	58102310	259	691.53	34.4988	27.7389	73.3488	309.47
Burrito	new_burrito_2	58102310	144	384.48	19.1808	15.4224	40.7808	155.62
Burrito	new_burrito_3	58102310	115	307.05	15.318	12.3165	32.568	133.98
Burrito	new_burrito_4	58102310	441	1177.47	58.7412	47.2311	124.891	520.98
Cabbage	cabbage_1	75105000	33	10.23	0.4719	0.0528	2.4321	55.73
Cabbage	cabbage_2	75105000	34	10.54	0.4862	0.0544	2.5058	45.93
Cabbage	cabbage_3	75105000	33	10.23	0.4719	0.0528	2.4321	55.3
Cabbage	cabbage_4	75105000	24	7.44	0.3432	0.0384	1.7688	63.23
Cabbage	cabbage_5	75105000	1861	576.91	26.6123	2.9776	137.156	2006.98
Cabbage	cabbage_6	75105000	34	10.54	0.4862	0.0544	2.5058	63.12
Cabbage	new_cabbage_1	75105000	834	258.54	11.9262	1.3344	61.4658	1053.3
Cabbage	new_cabbage_2	75105000	24	7.44	0.3432	0.0384	1.7688	18.03
Cabbage	new_cabbage_3	75103000	660	165	8.448	0.66	38.28	1295.07
Cabbage	new_cabbage_4	75103000	16	4	0.2048	0.016	0.928	88.73
Cake	cake_4	53100100	121	425.92	3.4364	17.8717	64.856	148.35
Cake	last_cake_1	53104500	77	271.04	2.1868	11.3729	41.272	74.8
Cake	last_cake_2	53104500	93	327.36	2.6412	13.7361	49.848	99.87
Cake	last_cake_3	53104260	206	725.12	5.8504	30.4262	110.416	354.1
Cake	last_cake_4	53120270	195	686.4	5.538	28.8015	104.52	413.23
Carrot	carrot_1	73101010	88	36.08	0.8184	0.2112	8.4304	79.23
Carrot	carrot_2	73101010	93	38.13	0.8649	0.2232	8.9094	60.21
Carrot	carrot_3	73102212	134	52.26	1.0854	0.6298	10.586	164.39
Carrot	carrot_4	73102241	122	109.8	1.098	3.2696	20.3496	193.72
Carrot	carrot_5	73101010	39	15.99	0.3627	0.0936	3.7362	181.26
Carrot	carrot_6	73101010	102	41.82	0.9486	0.2448	9.7716	96.85
Carrot	carrot_7	73101010	93	38.13	0.8649	0.2232	8.9094	85.81
Carrot	carrrot_8	73101010	121	49.61	1.1253	0.2904	11.5918	311.88
Carrot	carrot_9	73101010	9	3.69	0.0837	0.0216	0.8622	7.43
Carrot	new_carrot_1	73102222	106	64.66	0.8374	3.18	8.1302	220.32
Carrot	new_carrot_2	73101010	25	10.25	0.2325	0.06	2.395	7.45
Carrot	new_carrot_3	73101010	9	3.69	0.0837	0.0216	0.8622	22.61
Cauliflower	new_cauliflower_1	75107000	815	203.75	15.648	2.282	40.5055	1368.71
Cauliflower	new_cauliflower_2	75107000	25	6.25	0.48	0.07	1.2425	30.97
Cauliflower	new_cauliflower_3	75107000	66	16.5	1.2672	0.1848	3.2802	79.19
Cauliflower	new_cauliflower_4	75107000	56	14	1.0752	0.1568	2.7832	69.37
Cauliflower	new_cauliflower_5	75107000	32	8	0.6144	0.0896	1.5904	39.69
Cereal bars	new_cereal_bar_1	53710906	21	98.91	2.121	4.158	13.524	26.71
Cereal bars	new_cereal_bar_2	53714200	48	230.4	3.6096	9.8016	31.1808	52.4
Cereal bars	new_cereal_bar_3	53714400	23	95.91	0.782	2.07	18.515	56.37
Cereal bars	new_cereal_bar_4	53710904	34	165.58	3.1076	7.7724	20.7876	44.63
Cereal bars	new_cereal_bar_5	53714520	37	139.12	1.628	2.775	26.936	55.56
Chicken_breast	breast_1	24120120	78	112.32	21.8712	2.7846	0	116.27
Chicken_breast	breast_2	24120120	128	184.32	35.8912	4.5696	0	149.53
Chicken_breast	breast_3	24120120	122	175.68	34.2088	4.3554	0	258.31
Chicken_breast	breast_4	24120120	127	182.88	35.6108	4.5339	0	245.75
Chicken_Nugget	Nugget_1	24198729	14	42.98	2.2288	2.8504	2.0902	22.52
Chicken_Nugget	Nugget_2	24198729	15	46.05	2.388	3.054	2.2395	22.52
Chicken_Nugget	Nugget_3	24198729	15	46.05	2.388	3.054	2.2395	20.47
Chicken_Nugget	Nugget_4	24198729	9	27.63	1.4328	1.8324	1.3437	9.09
Chicken_Nugget	Nugget_5	24198729	11	33.77	1.7512	2.2396	1.6423	17.82
Chicken_Nugget	Nugget_6	24198729	14	42.98	2.2288	2.8504	2.0902	11.06
Chicken_Nugget	Nugget_7	24198729	24	73.68	3.8208	4.8864	3.5832	50.59
Chicken_Nugget	Nugget_8	24198729	23	70.61	3.6616	4.6828	3.4339	42.31
Chicken_Nugget	Nugget_9	24198729	23	70.61	3.6616	4.6828	3.4339	37.13
Chicken_Nugget	new_chicken_nugget_1	24198731	14	42.98	2.2288	2.8504	2.0902	19.35
Chicken_Nugget	new_chicken_nugget_2	24198736	19	56.62	2.5384	3.6537	3.3972	22.61
Chicken_tender	tender_1	24198739	57	154.47	10.9554	7.9515	9.8325	63.28
Chicken_tender	tender_2	24198739	44	119.24	8.4568	6.138	7.59	45.85
Chicken_tender	tender_3	24198739	37	100.27	7.1114	5.1615	6.3825	42.06
Chicken_tender	tender_4	24198739	38	102.98	7.3036	5.301	6.555	39.37
Chicken_tender	tender_5	24198739	32	86.72	6.1504	4.464	5.52	43.95
Chicken_thighs	thigh_1	24150210	109	246.34	24.5359	16.4372	0.1308	133.97
Chicken_thighs	thigh_2	24150210	94	212.44	21.1594	14.1752	0.1128	109.59
Chicken_thighs	thigh_3	24150210	207	467.82	46.5957	31.2156	0.2484	248.83
Chicken_thighs	thigh_5	24157320	161	473.34	26.1786	31.6687	20.93	178.42
Chicken_thighs	thigh_6	24157320	181	532.14	29.4306	35.6027	23.53	250.97
Chicken_thighs	thigh_7	24152250	180	437.4	40.626	29.25	0	208.71
Chicken_wings	wings_1	24167220	59	190.57	10.4843	12.5552	8.85	81.42
Chicken_wings	wings_2	24167220	56	180.88	9.9512	11.9168	8.4	85.82
Chicken_wings	wings_3	24167220	80	258.4	14.216	17.024	12	111.55
Chicken_wings	wings_4	24162140	58	149.06	13.5836	10.4632	0.348	58.42
Chicken_wings	wings_5	24168001	38	104.88	6.441	6.6082	4.9894	38.42
Chicken_wings	wings_6	24168021	35	94.85	6.0165	6.0095	4.2035	42.38
Chicken_wings	wings_7	24167220	28	90.44	4.9756	5.9584	4.2	47.28
Chocolate	new_chocolate_1	91705400	59	318.01	3.4633	18.9331	34.9516	55.56
Chocolate	new_chocolate_2	91705030	14	67.2	0.588	4.2	8.946	17.26
Chocolate	new_chocolate_3	91705300	149	819.5	7.5841	47.978	89.3553	223.06
Chocolate	new_chocolate_4	91705300	17	93.5	0.8653	5.474	10.1949	27.93
Cinnamon_Roll	cinnamon_bun_1	51160100	107	398.04	6.634	17.548	54.463	280.36
Cinnamon_Roll	cinnamon_bun_2	51160100	85	316.2	5.27	13.94	43.265	210.7
Cinnamon_Roll	cinnamon_bun_3	51160100	73	271.56	4.526	11.972	37.157	181.65
Cinnamon_Roll	cinnamon_bun_4	51160100	152	565.44	9.424	24.928	77.368	415.78
Cinnamon_Roll	cinnamon_bun_5	51160100	156	580.32	9.672	25.584	79.404	364.08
Cinnamon_Roll	cinnamon_bun_6	51160100	152	565.44	9.424	24.928	77.368	410.94
Cinnamon_Roll	new_cinnamon_roll_1	51160100	36	133.92	2.232	5.904	18.324	43.84
Coleslaw	coleslaw_1	75140990	114	181.26	1.0032	13.4292	14.079	126.65
Coleslaw	new_coleslaw_1	75140990	167	265.53	1.4696	19.6726	20.6245	305.23
Coleslaw	new_coleslaw_2	75140990	354	562.86	3.1152	41.7012	43.719	261.67
Coleslaw	new_coleslaw_3	75141000	180	203.4	2.052	14.202	18.036	348
Coleslaw	new_coleslaw_4	75141000	225	254.25	2.565	17.7525	22.545	439.07
Cookies	Cookies_1	53209015	11	51.04	0.5731	2.1054	7.81	16.03
Cookies	Cookies_3	53244020	50	216.5	1.69	7.465	36.35	60.33
Cookies	Cookies_4	53201000	36	177.12	1.836	8.8992	23.5296	44.24
Cookies	Cookies_5	53201000	43	211.56	2.193	10.6296	28.1048	57.82
Cookies	Cookies_6	53206000	42	206.64	2.142	10.3824	27.4512	55.25
Corn dog	new_corn_dog_1	27560300	77	192.5	6.5989	9.2554	20.7592	105.43
Corn dog	new_corn_dog_2	27560300	80	200	6.856	9.616	21.568	109.99
Corn dog	new_corn_dog_3	27560300	219	547.5	18.7683	26.3238	59.0424	354.86
Corn dog	new_corn_dog_4	27560300	139	347.5	11.9123	16.7078	37.4744	208.01
Corn dog	new_corn_dog_5	27560300	188	470	16.1116	22.5976	50.6848	269.12
Corn_Stick	corn1	75216111	242	208.12	7.8892	3.267	45.1088	263.1
Corn_Stick	corn2	75216111	272	233.92	8.8672	3.672	50.7008	295.13
Corn_Stick	corn3	75216111	275	236.5	8.965	3.7125	51.26	300.14
Corn_Stick	corn4	75216111	316	271.76	10.3016	4.266	58.9024	426.77
Corn_Stick	corn5	75216111	341	293.26	11.1166	4.6035	63.5624	457.39
Corn_Stick	corn6	75216111	291	250.26	9.4866	3.9285	54.2424	306.96
Corn(bowl)	corn_bowl_1	75216111	228	196.08	7.4328	3.078	42.4992	320.41
Corn(bowl)	corn_bowl_2	75216111	228	196.08	7.4328	3.078	42.4992	356.29
Corn(bowl)	new_corn_1	75216111	321	276.06	10.4646	4.3335	59.8344	526.04
Corn(bowl)	new_corn_2	75216111	172	147.92	5.6072	2.322	32.0608	378.33
Corn(bowl)	new_corn_3	75216113	198	132.66	4.5342	2.4156	28.3932	421.59
Corn(bowl)	new_corn_4	75216113	255	170.85	5.8395	3.111	36.567	390.58
Croissant	Croissant_1	51166000	45	182.7	3.69	9.45	20.61	157.34
Croissant	Croissant_2	51166000	49	198.94	4.018	10.29	22.442	181.36
Croissant	Croissant_3	51166000	46	186.76	3.772	9.66	21.068	176.57
Croissant	Croissant_4	51166000	67	272.02	5.494	14.07	30.686	412.31
Croissant	Croissant_5	51166000	64	259.84	5.248	13.44	29.312	404.92
Croissant	Croissant_6	51166000	68	276.08	5.576	14.28	31.144	303.41
Croissant	new_croissant_1	51166000	77	312.62	6.314	16.17	35.266	143.32
Croissant	new_croissant_2	51166000	59	239.54	4.838	12.39	27.022	232.8
Cottage cheese	new_cottage_cheese_1	14201010	428	419.44	47.5936	18.404	14.4664	450.31
Cottage cheese	new_cottage_cheese_2	14200100	111	91.02	12.21	2.553	4.7841	106.78
Cottage cheese	new_cottage_cheese_3	14200100	118	96.76	12.98	2.714	5.0858	116.9
Cottage cheese	new_cottage_cheese_4	14200100	166	136.12	18.26	3.818	7.1546	154.76
Cottage cheese	new_cottage_cheese_5	14204010	171	140.22	18.81	3.933	7.3701	151.28
Crab	new_crab_1	26305160	136	112.88	24.3168	1.0064	0	268.11
Crab	new_crab_2	26305180	141	117.03	25.2108	1.0434	0	168.83
Crab cake	new_crab_cake_1	27250040	26	55.64	3.744	3.8922	1.1648	37.33
Crab cake	new_crab_cake_2	27250040	26	55.64	3.744	3.8922	1.1648	28.69
Crab cake	new_crab_cake_3	27250040	25	53.5	3.6	3.7425	1.12	28.69
Crab cake	new_crab_cake_4	27250040	27	57.78	3.888	4.0419	1.2096	35.31
Crab cake	new_crab_cake_5	27550110	57	131.67	7.2618	6.3726	11.0523	74.36
Cucumber	new_cucumber_1	75111000	93	13.95	0.6045	0.1023	3.3759	93.98
Cucumber	new_cucumber_2	75111000	68	10.2	0.442	0.0748	2.4684	65.77
Cucumber	new_cucumber_3	75111000	115	17.25	0.7475	0.1265	4.1745	112.51
Cucumber	new_cucumber_4	75111000	14	2.1	0.091	0.0154	0.5082	13.09
Cucumber	new_cucumber_5	75111000	45	6.75	0.2925	0.0495	1.6335	60.39
Doughnut	doughnut1	53521110	66	277.86	4.0524	14.982	31.6338	188.15
Doughnut	doughnut3	53521230	59	217.12	2.6668	11.033	27.2875	157.22
Doughnut	doughnut4	53521110	71	298.91	4.3594	16.117	34.0303	143.16
Doughnut	doughnut5	53521110	81	341.01	4.9734	18.387	38.8233	188.96
Doughnut	doughnut6	53521110	84	353.64	5.1576	19.068	40.2612	210.53
Doughnut	doughnut7	53521110	68	286.28	4.1752	15.436	32.5924	114.35
Edamame	new_edamame_1	41420020	3	4.2	0.3462	0.2274	0.2589	3.55
Edamame	new_edamame_2	41420020	4	5.6	0.4616	0.3032	0.3452	4.92
Edamame	new_edamame_3	41420020	3	4.2	0.3462	0.2274	0.2589	13.72
Edamame	new_edammame_4	41420020	137	191.8	15.8098	10.3846	11.8231	169.74
Edamame	new_edamame_5	41420020	108	151.2	12.4632	8.1864	9.3204	306.76
Egg	boiledegg1	31103010	46	65.78	5.704	4.5816	0.4416	45.66
Egg	boiledegg2	31103010	60	85.8	7.44	5.976	0.576	101.89
Egg	new_egg_1	31103010	52	74.36	6.448	5.1792	0.4992	53.24
Egg	new_egg_3	31103010	58	82.94	7.192	5.7768	0.5568	52.16
Egg	new_egg_4	31101010	58	82.94	7.192	5.7768	0.5568	56.35
Falafel	new_falafel_1	41209000	28	143.92	2.3184	11.5332	8.1088	30.9
Falafel	new_falafel_2	41209000	26	133.64	2.1528	10.7094	7.5296	29.05
Falafel	new_falafel_3	41209000	27	138.78	2.2356	11.1213	7.8192	30.75
Falafel	new_falafel_4	41209000	29	149.06	2.4012	11.9451	8.3984	32.87
Falafel	new_falafel_5	41209000	28	143.92	2.3184	11.5332	8.1088	31.82
Frankfurter_Sandwich	Frank_Sandwich_1	25210110	205	635.5	23.985	57.4	5.9245	367.25
Frankfurter_Sandwich	Frank_Sandwich_2	25210110	191	592.1	22.347	53.48	5.5199	589.83
Frankfurter_Sandwich	Frank_Sandwich_3	27564060	159	470.64	17.25	27.61	37.73	286.26
Frankfurter_Sandwich	Frank_Sandwich_4	27564060	140	414.4	15.1887	24.3107	33.2214	275.25
Frankfurter_Sandwich	Frank_Sandwich_5	27564060	100	296	10.8491	17.3648	23.7296	180.38
French_Fry	fries_1	71401030	69	215.28	2.3667	10.1637	28.5936	300.14
French_Fry	fries_2	71401030	5	15.6	0.1715	0.7365	2.072	11.8
French_Fry	new_fries_3	71401031	71	205.19	2.4779	9.9684	26.412	259.78
French_Fry	new_fries_4	71401031	267	771.63	9.3183	37.4868	99.324	864.91
French_Fry	new_waffle_fry_1	71401031	10	28.9	0.349	1.404	3.72	16.43
French_Fry	new_waffle_fry_2	71401031	134	387.26	4.6766	18.8136	49.848	697.02
Fried mushrooms	new_fried_mushroom_1	75414030	13	28.86	0.6019	1.6783	2.847	15.98
Fried mushrooms	new_fried_mushroom_2	75414030	11	24.42	0.5093	1.4201	2.409	14.95
Fried mushrooms	new_fried_mushroom_3	75414030	10	22.2	0.463	1.291	2.19	11.66
Fried mushrooms	new_fried_mushroom_4	75414030	16	35.52	0.7408	2.0656	3.504	17.58
Fried mushrooms	new_fried_mushroom_5	75414030	10	22.2	0.463	1.291	2.19	13.13
French_toast	Toast_1	55300050	127	393.7	12.4968	18.161	45.3517	387.22
French_toast	Toast_2	55300050	141	437.1	13.8744	20.163	50.3511	392.58
French_toast	toast_3	55300050	90	279	8.856	12.87	32.139	162.18
French_toast	toast_4	55300050	51	158.1	5.0184	7.293	18.2121	108.56
French_toast	toast_5	55300050	54	167.4	5.3136	7.722	19.2834	121.37
Fried_egg	fried_egg_1	31105030	42	80.64	4.8552	6.6402	0.378	10.47
Fried_egg	fried_egg_3	31105030	75	144	8.67	11.8575	0.675	66.77
Fried_egg	new_fried_egg_1	31105010	308	440.44	38.0688	30.5844	2.9568	58.5
Fried_egg	new_fried_egg_2	31105040	265	482.3	30.7665	38.796	2.385	20.11
Fried_rice	new_fried_rice_1	58150110	162	281.88	6.2208	5.1678	52.65	285.17
Fried_rice	new_fried_rice_2	58150110	116	201.84	4.4544	3.7004	37.7	507.19
Fried_rice	last_fried_rice_1	58150110	461	802.14	17.7024	14.7059	149.825	666.5
Grapes	new_grape_1	63123000	311	214.59	2.2392	0.4976	56.291	412.49
Grapes	new_grape_2	63123000	125	86.25	0.9	0.2	22.625	139.04
Grapes	new_grape_3	63123000	19	13.11	0.1368	0.0304	3.439	17.09
Grapes	new_grape_4	63123000	89	61.41	0.6408	0.1424	16.109	86.44
Grapes	new_grape_5	63123000	43	29.67	0.3096	0.0688	7.783	32.4
Green_Bean	Green_bean_1	75205021	7	2.24	0.133	0.0161	0.5068	9.94
Green_Bean	Green_bean_2	75205021	4	1.28	0.076	0.0092	0.2896	3.3
Green_Bean	new_green_bean_1	75205022	6	1.68	0.0894	0.0102	0.3858	6.56
Green_Bean	new_green_bean_2	75205022	7	1.96	0.1043	0.0119	0.4501	6.9
Green_Bean	new_green_bean_3	75205023	4	0.96	0.0416	0.0156	0.1644	4.38
Green_Bean	new_green_bean_4	75205023	7	1.68	0.0728	0.0273	0.2877	6.63
Green_beans	Green_beans_1	75205021	104	33.28	1.976	0.2392	7.5296	212.02
Green_beans	Green_beans_2	75205021	100	32	1.9	0.23	7.24	3.3
Green_beans	new_green_beans_1	75101800	134	41.54	2.4522	0.2948	9.3398	302.79
Green_beans	new_green_beans_2	75101800	91	28.21	1.6653	0.2002	6.3427	365.38
Green_beans	new_green_beans_3	75101800	82	25.42	1.5006	0.1804	5.7154	255.23
Green_beans	new_green_beans_4	75101800	197	61.07	3.6051	0.4334	13.7309	427.43
Guacamole	guacamole_1	63409010	107	165.85	2.0865	15.1725	9.0415	108.03
Guacamole	guacamole_2	63409015	229	332.05	4.2823	29.9761	18.5261	297.96
Guacamole	new_guacamole_1	63409010	246	381.3	4.797	34.8828	20.787	245.44
Guacamole	new_guacamole_2	63409010	158	244.9	3.081	22.4044	13.351	192.77
Guacamole	new_guacamole_3	63409010	112	173.6	2.184	15.8816	9.464	119.44
Guacamole	new_guacamole_4	63409010	109	168.95	2.1255	15.4562	9.2105	115.98
Gyoza	new_gyoza_1	58121620	15	41.7	1.4	2.14	4.18	20.89
Gyoza	new_gyoza_3	58121620	15	41.7	1.4	2.14	4.18	31.13
Gyoza	new_gyoza_4	58121620	15	41.7	1.4	2.14	4.18	20.45
Gyoza	new_gyoza_5	58121620	14	38.92	1.31	2	3.91	21.67
Hashbrown	hash1	71404000	230	499.1	6.026	26.404	64.929	153.77
Hashbrown	new_hashbrown_1	71404030	310	843.2	7.998	52.824	89.528	669.8
Hashbrown	new_hashbrown_2	71404030	170	462.4	4.386	28.968	49.096	55.33
Hashbrown	new_hashbrown_3	71404040	49	144.55	2.9547	9.7363	11.9903	28.85
Hashbrown	new_hashbrown_4	71404040	81	238.95	4.8843	16.0947	19.8207	192.48
Ice_cream	ice_cream_1	13110000	203	448.63	7.2471	22.939	53.5108	288.53
Ice_cream	ice_cream_4	13120792	90	317.7	4.815	19.62	31.158	134.96
Ice_cream	new_ice_cream_1	13110112	261	649.89	10.2573	30.6936	89.7579	372.49
Ice_cream	new_ice_cream_2	13110112	122	303.78	4.7946	14.3472	41.9558	176.02
Ice_cream	new_ice_cream_3	13110100	120	248.4	4.2	13.2	28.32	162.81
Ice_cream	new_ice_cream_4	13120500	57	150.48	2.4396	6.726	20.4516	103.69
Kiwi	new_kiwi_1	63126500	126	80.64	1.3356	0.5544	17.64	125.19
Kiwi	new_kiwi_2	63126500	64	40.96	0.6784	0.2816	8.96	64.01
Kiwi	new_kiwi_3	63126500	16	10.24	0.1696	0.0704	2.24	14.45
Kiwi	new_kiwi_4	63126500	39	24.96	0.4134	0.1716	5.46	38.03
Kiwi	new_kiwi_5	63126500	125	80	1.325	0.55	17.5	124.08
Lasagna	lasagna1	58130016		422.84	22.6083	15.0722	49.0699	328.32
Lasagna	new_lasagna_1	58130014	368	680.8	39.8544	39.3392	41.8048	254.88
Lasagna	new_lasagna_2	58130014	292	540.2	31.6236	31.2148	33.1712	342.03
Lasagna	new_lasagna_3	58130013	141	136.77	4.5684	4.8081	18.6966	1051.03
Lasagna	new_lasagna_4	58130013	931	903.07	30.1644	31.7471	123.451	137.21
Lobster	new_lobster_1	26311110	63	61.11	13.1733	0.5985	0	92.81
Lobster	new_lobster_2	26311160	93	90.21	19.4463	0.8835	0	169.23
Mac	Mac1	58145111	186	280.86	10.0812	11.2716	34.968	215.64
Mac	Mac3	58145111	1	1.51	0.0542	0.0606	0.188	1.46
Mac	new_mac_and_cheese_1	58145117	243	267.3	7.9218	4.5198	48.843	367.3
Mac	new_mac_and_cheese_2	58145110	172	383.56	14.9296	18.06	39.6976	134.2
Mac	new_mac_and_cheese_3	58145120	140	229.6	10.626	9.506	25.522	141.54
Mac	new_mac_and_cheese_4	58145135	465	976.5	54.8235	51.894	75.051	526.9
Mango	new_mango_1	63129010	376	225.6	3.0832	1.4288	56.3248	377.38
Mango	new_mango_2	63129010	408	244.8	3.3456	1.5504	61.1184	411.42
Mango	new_mango_3	63129010	107	64.2	0.8774	0.4066	16.0286	113.16
Mango	new_mango_4	63129010	300	180	2.46	1.14	44.94	298.48
Mango	new_mango_5	63129010	380	228	3.116	1.444	56.924	392.5
Mashed_Potato	mash1	71501016	130	179.4	2.691	9.386	21.801	120.69
Mashed_Potato	new_mashed_potato_1	71501005	188	167.32	3.102	5.3016	27.542	171.09
Mashed_Potato	new_mashed_potato_2	71501005	201	178.89	3.3165	5.6682	29.4465	198.34
Mashed_Potato	new_mashed_potato_3	71501007	80	84.8	1.576	4.008	10.632	103.94
Meatloaf	meatloaf_1	27214100	155	308.45	27.094	16.616	11.16	50.71
Meatloaf	meatloaf_2	27214100	105	208.95	18.354	11.256	7.56	91.49
Meatloaf	meatloaf_3	27214100	89	177.11	15.5572	9.5408	6.408	78.35
Meatloaf	new_meatloaf_1	27214110	98	155.82	13.5044	8.183	6.6346	95
Meatloaf	new_meatloaf_2	27214110	103	163.77	14.1934	8.6005	6.9731	100.49
Meatloaf	new_meatloaf_3	27214110	109	173.31	15.0202	9.1015	7.3793	99.83
Melons	melon_1	63149010	17	5.1	0.1037	0.0255	1.2835	24.53
Melons	melon_10	63109010	40	15.2	0.328	0.072	3.264	41.15
Melons	melon_12	63127010	24	8.64	0.1296	0.0336	2.1816	23.02
Melons	melon_13	63109010	20	7.6	0.164	0.036	1.632	38.87
Melons	melon_2	63149010	23	6.9	0.1403	0.0345	1.7365	31.04
Melons	melon_3	63149010	18	5.4	0.1098	0.027	1.359	25.6
Melons	melon_4	63149010	23	6.9	0.1403	0.0345	1.7365	22.94
Melons	melon_5	63109010	36	13.68	0.2952	0.0648	2.9376	52.52
Melons	melon_6	63109010	28	10.64	0.2296	0.0504	2.2848	31.17
Melons	melon_8	63109010	31	11.78	0.2542	0.0558	2.5296	48.62
Melons	melon_9	63109010	35	13.3	0.287	0.063	2.856	33.84
Muffin	muffin_1	52302010	101	378.75	4.5349	16.2307	53.53	232.74
Muffin	muffin_2	52302600	98	387.1	6.4092	18.375	49.9212	217.7
Muffin	last_muffin_1	52302010	30	118.5	1.962	5.625	15.282	51.25
Muffin	last_muffin_2	52302500	30	118.5	1.962	5.625	15.282	46.65
Muffin	last_muffin_3	52302010	68	268.6	4.4472	12.75	34.6392	109.56
Nachos	nachos1	58104180	468	2208	33.22	25.27	317.21	615.36
Nachos	new_nachos_1	58104120	82	217.3	3.7392	12.8002	22.7632	135.82
Nachos	new_nachos_2	58104120	135	357.75	6.156	21.0735	37.476	116.32
Nachos	new_nachos_3	58104130	402	1061.28	43.4562	63.7572	79.6764	1012.18
Nachos	new_nachos_4	58104150	439	1057.99	49.4753	58.1236	87.0098	814.21
Nutrition bars	new_nutrition_bar_1	53720200	69	238.74	10.1499	4.0572	45.1536	58.6
Nutrition bars	new_nutrition_bar_2	53720200	71	245.66	10.4441	4.1748	46.4624	60.88
Nutrition bars	new_nutrition_bar_3	53720200	71	245.66	10.4441	4.1748	46.4624	61.44
Nutrition bars	new_nutrition_bar_4	53720200	67	231.82	9.8557	3.9396	43.8448	62.36
Nutrition bars	new_nutrition_bar_5	53720200	70	242.2	10.297	4.116	45.808	64.07
Omelet	omelet_1	32129990	402	743.7	46.5516	60.3	3.6582	371.88
Omelet	omelet_2	32130440	264	340.56	29.4096	22.9944	3.7488	278.83
Omelet	omelet_3	32130240	317	621.32	40.6394	49.4837	3.1066	350.4
Omelet	new_omlet_1	32130490	165	275.55	17.4075	21.7965	2.475	204.16
Omelet	new_omlet_2	32130110	124	264.12	15.7232	21.5884	1.7112	151.86
Omelet	new_omlet_3	32130010	203	389.76	23.4668	32.0943	1.827	228.71
Omelet	new_omlet_4	32130490	257	429.19	27.1135	33.9497	3.855	282.88
Onion	new_onion_1	75117020	275	104.5	2.365	0.22	23.265	293.54
Onion	new_onion_2	75117020	97	36.86	0.8342	0.0776	8.2062	108.47
Onion	new_onion_3	75117020	49	18.62	0.4214	0.0392	4.1454	80.28
Onion	new_onion_4	75117020	26	9.88	0.2236	0.0208	2.1996	37.28
Onion	new_onion_5	75117020	207	78.66	1.7802	0.1656	17.5122	223.6
Pancake	pancake_1	55100050	270	828.9	19.332	41.796	92.178	531.43
Pancake	pancake_2	55100050	264	810.48	18.9024	40.8672	90.1296	196.32
Pancake	pancake_3	55100050	160	491.2	11.456	24.768	54.624	68.07
Pancake	pancake_4	55100050	192	589.44	13.7472	29.7216	65.5488	521.38
Pancake	new_pancake_1	55100060	90	324	6.714	16.812	36.018	198.17
Pancake	new_pancake_2	55100010	160	372.8	8.368	10.928	60.4	360.63
Pancake	new_pancake_4	55100020	36	80.64	1.7964	2.3472	13.1292	54.73
Pancake	new_pancake_5	55100020	40	89.6	1.996	2.608	14.588	70.13
Papaya	new_pappaya_1	63133010	984	423.12	4.6248	2.5584	106.469	1090.14
Papaya	new_pappaya_2	63133010	455	195.65	2.1385	1.183	49.231	487.85
Papaya	new_pappaya_3	63133010	521	224.03	2.4487	1.3546	56.3722	578.91
Papaya	new_pappaya_4	63133010	17	7.31	0.0799	0.0442	1.8394	16.87
Papaya	new_pappaya_5	63133010	10	4.3	0.047	0.026	1.082	10.52
Pasta_mixed_dishes	pasta1	58146381	545	1111.74	20.8725	76.4055	84.0896	731.86
Pasta_mixed_dishes	new_pasta_and_mixed_dishes_1	58146381	308	628.32	11.7964	43.1816	47.5244	355.66
Pasta_mixed_dishes	new_pasta_and_mixed_dishes_2	58146321	265	471.7	14.3895	24.5125	47.011	357.05
Pasta_mixed_dishes	new_pasta_and_mixed_dishes_3	58146223	325	390	11.7325	9.685	63.18	400.36
Pasta_mixed_dishes	new_pasta_and_mixed_dishes_4	56130000	281	441.17	16.1856	2.5852	86.2108	204.64
Peach	new_peach_1	63135010	171	78.66	1.5561	0.4617	17.271	182.55
Peach	new_peach_3	63135010	183	84.18	1.6653	0.4941	18.483	193.1
Peach	new_peach_4	63135010	167	76.82	1.5197	0.4509	16.867	162.84
Peach	new_peach_5	63135140	9	4.86	0.036	0.0072	1.2231	20.09
Peanut butter and jelly sandwiches	new_pbj_1	42302015	93	346.89	10.7043	15.3729	42.0546	285.25
Peanut butter and jelly sandwiches	new_pbj_2	42302015	44	164.12	5.0644	7.2732	19.8968	116.7
Peanut butter and jelly sandwiches	new_pbj_3	42302020	117	434.07	14.6952	19.5741	50.544	325.13
Peanut butter and jelly sandwiches	new_pbj_4	42302020	57	211.47	7.1592	9.5361	24.624	144.59
Peanut butter and jelly sandwiches	new_pbj_5	42302020	114	422.94	14.3184	19.0722	49.248	294.46
Peanuts	peanuts_1	42111100	63	377.37	17.6589	33.075	9.6138	56.53
Peanuts	peanuts_2	42111100	41	245.59	11.4923	21.525	6.2566	93.15
Peanuts	new_peanut_3	42111100	10	59.9	2.803	5.25	1.526	16.85
Peanuts	peanuts_4	42111110	9	53.91	2.5227	4.725	1.3734	8.94
Peanuts	new_peanut_5	42111100	3	17.97	0.8409	1.575	0.4578	5.98
Peanuts	new_peanut_6	42111100	110	658.9	30.833	57.75	16.786	352.1
Pie	apple_pie_1	53300100	96	284.16	2.592	14.6688	36.048	132.71
Pie	apple_pie_2	53300100	80	236.8	2.16	12.224	30.04	124.62
Pie	new_pie_1	53342000	110	320.1	3.245	18.524	35.497	130.42
Pie	new_pie_2	53385000	94	413.6	5.546	23.5564	46.6522	91.67
Pie	new_pie_3	53301000	108	319.68	2.916	16.5024	40.554	138.6
Pie	new_pie_4	53305700	110	308	2.871	17.908	34.364	121.47
Pineapple	new_pineapple_1	63141010	2091	1045.5	11.2914	2.5092	274.339	2292.04
Pineapple	new_pineapple_2	63141010	2006	1003	10.8324	2.4072	263.187	2215.17
Pineapple	new_pineapple_3	63141140	29	17.98	0.116	0.0319	4.524	24.47
Pineapple	new_pineapple_4	63141140	32	19.84	0.128	0.0352	4.992	28.19
Pineapple	new_pineapple_5	63141140	32	19.84	0.128	0.0352	4.992	29.49
Pizza	pizza1	58106230	59	159.89	6.3779	6.2186	19.5703	119.83
Pizza	new_pizza_1	58106225	66	175.56	7.5174	6.3954	21.9978	91.58
Pizza	new_pizza_2	58107212	76	183.16	7.6988	8.8768	17.9284	188.58
Pizza	new_pizza_3	58106655	460	1260.4	63.71	57.04	122.452	530.71
Pizza	new_pizza_4	58106655	166	454.84	22.991	20.584	44.1892	267.47
Pork_Chop	Pork_Chop_1	22101000	201	367.83	55.275	15.1755	0	196.5
Pork_Chop	Pork_Chop_2	22101000	201	367.83	55.275	15.1755	0	187.05
Pork_Chop	Pork_Chop_3	22101000	210	384.3	57.75	15.855	0	201.85
Pork_Chop	Pork_Chop_4	22101000	210	384.3	57.75	15.855	0	184.73
Pork_Chop	Pork_Chop_6	22101000	199	364.17	54.725	15.0245	0	163.55
Pork_Rib	Pork_Rib_1	22701000	309	784.86	50.1198	46.7208	37.4817	15.15
Pork_Rib	Pork_Rib_2	22701000	332	843.28	53.8504	50.1984	40.2716	249.67
Pork_Rib	Pork_Rib_3	22701000	286	726.44	46.3892	43.2432	34.6918	257.63
Pudding	new_pudding_1	13210350	119	211.82	6.2237	5.8786	33.6056	188.35
Pudding	new_pudding_2	13210350	120	213.6	6.276	5.928	33.888	117.25
Pudding	new_pudding_3	13210410	203	219.24	6.5569	4.3645	37.3317	114.38
Pudding	new_pudding_4	13210520	119	154.7	2.3205	4.6172	25.8111	116.71
Pudding	new_pudding_5	13210520	117	152.1	2.2815	4.5396	25.3773	112.94
Quesadilla	quesadilla_1	58104740	54	155.52	7.8624	7.0632	14.7312	147.98
Quesadilla	quesadilla_3	58104730	60	183.6	8.508	9.132	16.368	179.9
Quesadilla	quesadilla_4	58104730	87	266.22	12.3366	13.2414	23.7336	96.92
Quesadilla	new_quesedilla_1	58104710	72	229.68	9.828	11.8368	20.5344	91.81
Quesadilla	new_quesedilla_2	58104710	88	280.72	12.012	14.4672	25.0976	112.72
Quesadilla	new_quesedilla_3	58104740	103	296.64	14.9968	13.4724	28.0984	136.08
Quesadilla	new_quesedilla_4	58104740	121	348.48	17.6176	15.8268	33.0088	148.82
Quickbread	Quickbread_1	52201000	58	191.4	3.8222	5.5564	31.5868	105.16
Quickbread	Quickbread_2	52201000	58	191.4	3.8222	5.5564	31.5868	106.25
Quickbread	Quickbread_3	52201000	60	198	3.954	5.748	32.676	103.19
Quickbread	Quickbread_4	52201000	52	171.6	3.4268	4.9816	28.3192	131.59
Quickbread	Quickbread_5	52201000	67	221.1	4.4153	6.4186	36.4882	146.55
Rice	Rice_1	56205000	130	167.7	3.471	0.364	36.387	204.58
Rice	Rice_3	56205000	115	148.35	3.0705	0.322	32.1885	211.22
Rice	new_white_and_brown_rice_1	56205002	87	131.37	2.262	2.7144	23.6553	218.62
Rice	new_white_and_brown_rice_2	56205011	81	98.82	2.2113	0.7776	20.6145	195.68
Rice	new_white_and_brown_rice_3	56205012	431	603.4	11.4646	14.0937	107.147	600.22
Rice	new_rice_1	56205011	195	237.89	5.3235	1.8719	49.6273	210.78
Rice	new_rice_2	56205011	176	214.71	4.8047	1.6895	44.7912	91.17
Rice	new_rice_3	56205011	335	334.99	7.4963	2.636	69.8831	446.29
Salmon_Grill	Salmon_Grill_1	26137110	88	241.12	22.352	16.192	0.0088	85.18
Salmon_Grill	Salmon_Grill_2	26137110	51	139.74	12.954	9.384	0.0051	49.21
Salmon_Grill	Salmon_Grill_3	26137110	226	619.24	57.404	41.584	0.0226	211.66
Salmon_Grill	Salmon_Grill_4	26137110	163	446.62	41.402	29.992	0.0163	162.19
Salmon_Grill	new_salmon_1	26137123	165	427.35	42.768	27.192	0	147.89
Salmon_Grill	new_salmon_2	26137123	201	520.59	52.0992	33.1248	0	183.23
Salmon_Grill	new_salmon_3	26137123	59	152.81	15.2928	9.7232	0	54.05
Salmon_Grill	new_salmon_4	26137123	110	284.9	28.512	18.128	0	100.59
Sausages	new_sausage_1	25220350	94	313.02	12.8968	27.4292	2.679	90.15
Sausages	new_sausage_2	25220350	65	216.45	8.918	18.967	1.8525	68.43
Sausages	new_sausage_3	25220350	68	226.44	9.3296	19.8424	1.938	64.65
Sausages	new_sausage_4	25220350	14	46.62	1.9208	4.0852	0.399	14.41
Sausages	new_sausage_5	25221830	23	44.39	4.5195	2.8152	0.2507	20.43
Sandwich	Sandwich_1	27540350	156	336.96	20.8884	11.7624	40.8564	356.57
Sandwich	Sandwich_2	27541000	115	253	17.1465	8.6365	25.9325	218.44
Sandwich	Sandwich_3	27500050	50	146.5	6.41	6.015	16.905	174.44
Sandwich	Sandwich_4	27500050	53	155.29	6.7946	6.3759	17.9193	174.78
Sandwich	Sandwich_5	27514010	176	438.24	31.52	14.2	44.79	301.89
Sandwich	Sandwich_6	27500050	152	445.36	19.4864	18.2856	51.3912	595.88
Sandwich	Sandwich_7	27500050	137	401.41	17.5634	16.4811	46.3197	548.2
Sandwich	Sandwich_8	27500050	117	342.81	14.9994	14.0751	39.5577	514.38
Shrimp	Shrimp_1	26319140	9	19.62	1.1034	1.1646	1.1169	13.46
Shrimp	Shrimp_3	26319140	13	28.34	1.5938	1.6822	1.6133	16.23
Shrimp	Shrimp_5	58150510	3	4.98	0.2004	0.0891	0.8355	2.36
Shrimp	Shrimp_6	58150510	3	4.98	0.2004	0.0891	0.8355	2.76
Shrimp	Shrimp_7	26319140	165	359.7	20.29	21.35	20.47	415.77
Shrimp	Shrimp_8	27150110	8	7.92	1.0592	0.0976	0.6336	10.93
Soup	soup1	74601010	252	148.68	6.048	3.2508	25.2756	237.35
Soup	new_soup_1	75607060	356	234.96	8.3304	13.2432	20.6836	378.36
Soup	new_soup_2	75607060	298	196.68	6.9732	11.0856	17.3138	379.05
Soup	new_soup_3	28310330	370	329.3	22.755	8.362	38.406	406.71
Steak	Steak_1	21101170	414	1076.4	103.5	73.4	0	145.53
Steak	Steak_3	21105130	124	322.4	31	21.98	0	114.84
Steak	Steak_4	21105130	124	322.4	31	21.98	0	116.23
Steak	last_steak_1	21101170	257	668.2	64.25	45.5553	0	277.65
Stew_Beef	stew_1	21304200	584	1477.22	106.28	82.34	70.83	668.69
Stew_Beef	new_beef_stew_1	27311410	375	296.25	23.3625	8.325	32.25	398.5
Stew_Beef	new_beef_stew_2	27311310	299	269.1	15.6676	11.9002	24.6675	407.39
Stew_Beef	beef_stew_3	27311310	309	278.1	16.1916	12.2982	25.4925	236.83
Stew_Beef	new_beef_stew_4	27211200	495	1089	72.1215	73.5075	32.3235	628.26
Strawberry	Strawberry_1	63223020	12	4.2	0.0768	0.0264	0.9156	13.58
Strawberry	Strawberry_2	63223020	34	11.9	0.2176	0.0748	2.5942	38.53
Strawberry	Strawberry_3	63223020	41	14.35	0.2624	0.0902	3.1283	49.65
Strawberry	new_strawberry_1	63223020	50	17.5	0.32	0.11	3.815	57.72
Sweet Potato	new_sweet_potato_1	73405010	201	152.76	2.7336	0.2814	35.4765	195.05
Sweet Potato	new_sweet_potato_2	73405010	234	177.84	3.1824	0.3276	41.301	217.15
Sweet Potato	new_sweet_potato_3	73405010	278	211.28	3.7808	0.3892	49.067	259.31
Sweet Potato	new_sweet_potato_4	73409000	260	244.4	4.368	6.136	44.096	302.57
Sweet Potato	new_sweet_potato_5	73409000	290	272.6	4.872	6.844	49.184	335.49
Sushi	Sushi_1	58151180	37	34.78	1.0804	0.2479	6.8117	42.87
Sushi	Sushi_2	58151180	24	22.56	0.7008	0.1608	4.4184	28
Sushi	Sushi_3	58151200	26	26.78	1.7888	0.3328	3.978	30.66
Sushi	sushi_5	58151170	26	24.18	0.4706	0.3822	4.6046	28.7
Sushi	sushi_6	58151180	30	28.2	0.876	0.201	5.523	33.08
Sushi	sushi_7	58151190	27	31.32	1.6065	0.8046	4.131	28.75
Sushi	sushi_8	58151200	29	29.87	1.9952	0.3712	4.437	32.33
Sushi	sushi_9	58151210	17	17	1.1917	0.0935	2.6639	22.15
Taco	taco_1	58102020	89	189.57	9.49	9.46	9.49	151.49
Taco	new_taco_1	58102050	97	205.64	15.7819	9.3411	14.8313	140.87
Taco	new_taco_2	58102210	117	321.75	13.5954	17.8893	26.8983	136.91
Taco	new_taco_4	58102110	194	500.52	32.4756	23.862	36.5884	222.05
Tofu	new_tofu_1	41420010	24	14.64	1.7208	0.8856	0.2832	24.47
Tofu	new_tofu_2	41420010	15	9.15	1.0755	0.5535	0.177	15.84
Tofu	new_tofu_3	41420010	19	11.59	1.3623	0.7011	0.2242	20.48
Tofu	new_tofu_4	41420010	7	4.27	0.5019	0.2583	0.0826	8.92
Tofu	new_tofu_5	41420010	13	7.93	0.9321	0.4797	0.1534	14.67
Tomato	tomato_3	74101000	145	29	1.189	0.4495	5.858	247.16
Tomato	Tomato_4	74101000	332	66.4	2.7224	1.0292	13.4128	283.3
Tomato	new_tomato_1	74101000	95	19	0.779	0.2945	3.838	87.96
Tomato	new_tomato_2	74101000	103	20.6	0.8446	0.3193	4.1612	92.29
Tomato	new_tomato_3	74101000	81	16.2	0.6642	0.2511	3.2724	74.23
Tomato	new_tomato_4	74101000	80	16	0.656	0.248	3.232	69.35
Tomato_slice	slice_1	74101000	70	14	0.574	0.217	2.828	66.72
Tomato_slice	new_tomato_slice_1	74101000	33	6.6	0.2706	0.1023	1.3332	36.05
Tomato_slice	new_tomato_slice_2	74101000	20	4	0.164	0.062	0.808	18.5
Tomato_slice	new_tomato_slice_3	74101000	14	2.8	0.1148	0.0434	0.5656	13.86
Tomato_slice	new_tomato_slice_4	74101000	6	1.2	0.0492	0.0186	0.2424	5.66
Tortilla	tortilla_1	52215000	44	115.28	3.058	2.3848	20.6844	88.74
Tortilla	new_tortilla_1	52215260	37	114.7	3.6112	3.6112	16.9793	17.25
Tortilla	new_tortilla_2	52215260	39	120.9	3.8064	3.8064	17.8971	-14.81
Tortilla	new_tortilla_3	52215200	40	122.4	3.28	3.196	19.752	-5.4
Tortilla	new_tortilla_4	52215200	40	122.4	3.28	3.196	19.752	101.74
Tortilla_Chips	tortilla_corn_chip_1	54401021	2	10.7	0.1224	0.662	1.1364	3.95
Tortilla_Chips	tortilla_corn_chip_2	54401021	22	117.7	1.3464	7.282	12.5004	27.41
Tortilla_Chips	tortilla_corn_chip_4	54401085	2	10.38	0.1472	0.5484	1.2162	4.51
Tortilla_Chips	tortilla_corn_chip_5	54401021	2	10.7	0.1224	0.662	1.1364	1.95
Tortilla_Chips	new_chips_1	54401075	3	14.16	0.213	0.6204	2.0334	2.11
Tortilla_Chips	new_chips_2	54401075	3	14.16	0.213	0.6204	2.0334	3.37
Tortilla_Chips	new_chips_3	54401075	3	14.16	0.213	0.6204	2.0334	5.75
Tortilla_Chips	new_chips_4	54401075	3	14.16	0.213	0.6204	2.0334	3.46
Tuna_salad	tuna_salad_1	27450060	81	156.33	8.1972	12.8385	2.2842	80.94
Tuna_salad	new_tuna_salad_1	27450060	54	104.22	5.4648	8.559	1.5228	101.15
Tuna_salad	new_tuna_salad_2	27450066	42	44.1	4.1454	2.1378	2.2134	96.91
Tuna_salad	new_tuna_salad_3	27450064	21	30.87	2.1063	2.1609	0.8274	23.63
Tuna_salad	new_tuna_salad_4	27450060	431	831.83	43.61	68.29	12.13	430.68
Waffle	Waffle_1	55200200	38	97.66	2.7132	1.3566	18.6808	104.78
Waffle	Waffle_2	55200200	46	118.22	3.2844	1.6422	22.6136	108.35
Waffle	waffle_4	55200060	69	199.41	4.6782	5.7891	32.223	94.91
Waffle	Waffle_5	55200200	72	185.04	5.1408	2.5704	35.3952	112.58
Waffle	waffle_6	55200110	191	916.8	16.4069	55.1226	88.051	472.1
Waffle	waffle_7	55200120	243	860.22	16.038	51.2487	83.7621	579.02
Waffle	new_waffle_1	55200110	172	825.6	14.7748	49.6392	79.292	425.23
Waffle	new_waffle_2	55208000	37	106.93	2.507	3.1	17.27	50.87
Waffle	new_waffle_4	55200020	29	89.61	2.1518	2.7521	14.0331	55.21
Waffle	new_waffle_5	55200030	31	90.52	3.0132	2.2785	14.4925	59.22
Whole_Chicken	Chicken_1	24102010	1307	2653.21	322.829	141.156	0	1548.6
Whole_Chicken	Chicken_2	24102010	1483	3010.49	366.301	160.164	0	1620.32
Whole_Chicken	Chicken_3	24102010	1480	3004.4	365.56	159.84	0	1642.18
Whole_Chicken	chicken_5	24102050	833	1366.12	223.161	52.9788	0	980.19
Yeast_bread	yeast_bread_1	51301010	33	90.42	3.5211	1.4949	15.6882	116.13
Yeast_bread	yeast_bread_2	51301010	26	71.24	2.7742	1.1778	12.3604	84.16
Yeast_bread	yeast_bread_3	51301010	30	82.2	3.201	1.359	14.262	123.38
Yeast_bread	yeast_bread_4	51109010	466	1206.94	44.2234	12.7218	224.193	1414.37
Yeast_bread	yeast_bread_5	51109010	454	1175.86	43.0846	12.3942	218.419	1480.65
Yeast_bread	yeast_bread_6	51133010	659	1792.48	70.8425	15.9478	341.889	2095.2
Yeast_bread	yeast_bread_7	51109010	43	111.37	4.0807	1.1739	20.6873	127.02
Yeast_bread	yeast_bread_8	51109010	32	82.88	3.0368	0.8736	15.3952	98.95
Yeast_bread	yeast_bread_9	51109010	27	69.93	2.5623	0.7371	12.9897	72.82
Yogurt	yogurt_1	11434020	172	141.04	13.8632	0.258	20.984	165.28
Yogurt	yogurt_2	11434020	108	88.56	8.7048	0.162	13.176	152.02
Yogurt	new_yogurt_1	11430000	157	139.73	7.3162	2.1509	22.7022	182.31
Yogurt	new_yogurt_2	11430000	158	140.62	7.3628	2.1646	22.8468	146.25
Yogurt	new_yogurt_3	11430000	155	137.95	7.223	2.1235	22.413	146.46
Yogurt	new_yogurt_4	11430000	157	139.73	7.3162	2.1509	22.7022	143.59
